# Supplementary material for: The Use of an Antioxidant Enables Accurate Evaluation of the Interaction of Curcumin on Organic Anion-Transporting Polypeptides 4C1 by Preventing Auto-Oxidation
Source: MDPI journal article supplement (doi:10.3390/ijms25020991), 2024-01-12
Supplement: s1 [file s1]

## Supplementary Materials Data

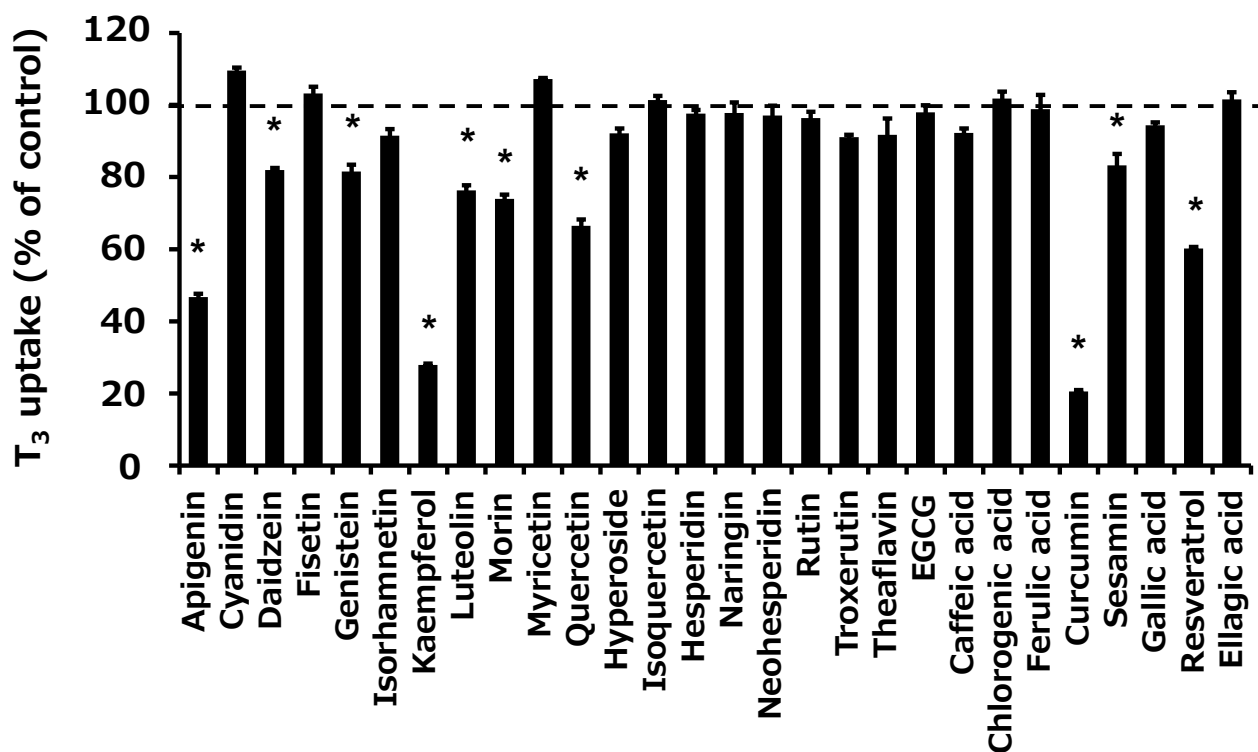

**Scheme 1. Screening of the effect of food ingredients on OATP4C1-mediated transport under the presence of AA.** Cells were incubated with 1  $\mu$ M  $T_3$  with or without food ingredients for 10 min at 37 °C under the presence of 10  $\mu$ M AA. The concentrations of the compounds were 100  $\mu$ M except for theaflavin (50  $\mu$ M). The amount of OATP4C1-mediated uptake was calculated by subtracting the nonspecific uptake of  $T_3$  by mock cells from the total cellular uptake by the OATP4C1-expressing cells. Data are shown as mean  $\pm$  standard error (S.E.) (n = 3). \* $p$  < 0.05, significantly different from control by one-way analysis of variance followed by Tukey's test.

**Scheme 1.** Inhibition parameters of food ingredients for OATP4C1 and other drug transporters in the liver and kidney.

| Inhibition (IC <sub>50</sub> or K <sub>i</sub> values (μM)) or elevation (EC <sub>50</sub> values (μM)) parameters |                            |                                                                                                                                                       |                                                                                      |                                                                                                                        |                                                 |                                                  |                                         |
|--------------------------------------------------------------------------------------------------------------------|----------------------------|-------------------------------------------------------------------------------------------------------------------------------------------------------|--------------------------------------------------------------------------------------|------------------------------------------------------------------------------------------------------------------------|-------------------------------------------------|--------------------------------------------------|-----------------------------------------|
| Compounds                                                                                                          | OATP4C1                    | OATP1B1                                                                                                                                               | OATP1B3                                                                              | OATP2B1                                                                                                                | OAT1                                            | OAT3                                             | P-gp                                    |
| <b>Apigenin</b>                                                                                                    | Yes (54%, 100 μM)          | 0.6 ± 0.2 <sup>1*</sup><br>53.4 ± 2.1 <sup>1</sup><br>Yes <sup>2</sup>                                                                                | 16.7 ± 1.6 <sup>1*</sup>                                                             | 13.9 ± 1.6 <sup>3</sup><br>20.8 ± 8.0 <sup>3</sup>                                                                     | 0.212 ± 0.010 <sup>4</sup>                      | 0.410 ± 0.157 <sup>4</sup>                       | -                                       |
| <b>Cyanidin</b>                                                                                                    | Yes (24%, 100 μM)          | -                                                                                                                                                     | -                                                                                    | Yes <sup>5</sup><br>22.3 ± 2.2 <sup>6</sup>                                                                            | -                                               | -                                                | -                                       |
| <b>Daidzein</b>                                                                                                    | Yes (40%, 100 μM)          | -                                                                                                                                                     | -                                                                                    | Yes <sup>5</sup><br>20.7 ± 4.3 <sup>6</sup>                                                                            | -                                               | -                                                | -                                       |
| <b>Fisetin</b>                                                                                                     | No                         | Yes <sup>2</sup>                                                                                                                                      | -                                                                                    | -                                                                                                                      | Yes <sup>7</sup>                                | -                                                | -                                       |
| <b>Genistein</b>                                                                                                   | Yes (42%, 100 μM)          | 14.9 ± 3.76 <sup>2</sup>                                                                                                                              | -                                                                                    | 8.6 ± 1.8 <sup>6</sup><br>Yes <sup>5</sup><br>4.6 ± 2.5 <sup>6</sup>                                                   | -                                               | -                                                | Yes <sup>8</sup>                        |
| <b>Isorhamnetin</b>                                                                                                | Yes (18%, 100 μM)          | 3.12 <sup>9</sup><br>46.12 ± 5.25 <sup>10</sup>                                                                                                       | 3.10 <sup>9</sup>                                                                    | 0.82 <sup>9</sup>                                                                                                      | -                                               | -                                                | -                                       |
| <b>Kaempferol</b>                                                                                                  | 25.1 ± 1.6*                | 16.0 ± 1.9 <sup>1*</sup><br>32.4 ± 2.2 <sup>1</sup><br>33.05 <sup>11</sup><br>3.28 ± 1.08 <sup>10</sup>                                               | 24.4 ± 1.8 <sup>1*</sup>                                                             | 15.1 ± 7.8 <sup>3*</sup><br>20.7 ± 1.8 <sup>3</sup><br>Yes <sup>5</sup>                                                | -                                               | -                                                | Yes <sup>12</sup>                       |
| <b>Luteolin</b>                                                                                                    | Yes (52%, 100 μM)          | 22.03 <sup>11</sup><br>0.85 <sup>13</sup><br>Yes <sup>2</sup>                                                                                         | -                                                                                    | Yes <sup>5</sup><br>0.42 <sup>13</sup>                                                                                 | 0.47 <sup>7</sup><br>5.17 <sup>14</sup>         | 4.20 <sup>14</sup>                               | -                                       |
| <b>Morin</b>                                                                                                       | Yes (57%, 100 μM)          | Yes <sup>2</sup>                                                                                                                                      | -                                                                                    | -                                                                                                                      | < 0.3 <sup>7</sup><br>0.5 <sup>15</sup>         | -                                                | Yes <sup>16</sup>                       |
| <b>Myricetin</b>                                                                                                   | No                         | Yes <sup>2</sup>                                                                                                                                      | -                                                                                    | -                                                                                                                      | Yes <sup>7</sup>                                | -                                                | -                                       |
| <b>Quercetin</b>                                                                                                   | Yes (50%, 100 μM)          | 8.8 ± 0.8 <sup>1*</sup><br>9.1 ± 1.0 <sup>1</sup><br>15.9 ± 1.4 <sup>17</sup><br>1.55 <sup>9</sup><br>3.28 ± 1.08 <sup>10</sup><br>1.82 <sup>18</sup> | 7.8 ± 1.7 <sup>1*</sup><br>3.22 <sup>9</sup>                                         | 8.7 ± 0.1 <sup>3*</sup><br>14.1 ± 1.3 <sup>3</sup><br>Yes <sup>5</sup><br>0.34 <sup>9</sup><br>7.5 ± 1.2 <sup>19</sup> | Yes <sup>7</sup>                                | -                                                | Yes <sup>20</sup>                       |
| <b>Hyperoside</b>                                                                                                  | No                         | -                                                                                                                                                     | -                                                                                    | 29.4 ± 1.5 <sup>19</sup>                                                                                               | -                                               | -                                                | -                                       |
| <b>Hesperidin</b>                                                                                                  | No                         | -                                                                                                                                                     | -                                                                                    | Yes <sup>5</sup><br>72.3 ± 1.4 <sup>19</sup><br>>300 <sup>21</sup><br>8.3 ± 1.2 <sup>22</sup><br>37.0 <sup>23</sup>    | -                                               | -                                                | -                                       |
| <b>Naringin</b>                                                                                                    | No                         | Yes<br>(<50%, 250 μM) <sup>1</sup>                                                                                                                    | 197.5 ± 1.1 <sup>1</sup>                                                             | 36.4 ± 8 <sup>21</sup><br>6.9 ± 1.4 <sup>22</sup>                                                                      | -                                               | -                                                | Yes <sup>24</sup>                       |
| <b>Rutin</b>                                                                                                       | No                         | Yes<br>(<50%, 150 μM) <sup>1</sup><br>Elevation<br>(81.1%, 50 μM) <sup>2</sup>                                                                        | 111.5 ± 1.1 <sup>1</sup>                                                             | 60.7 ± 1.2 <sup>19</sup>                                                                                               | -                                               | -                                                | Yes <sup>20</sup>                       |
| <b>Theaflavin</b>                                                                                                  | No                         | -                                                                                                                                                     | -                                                                                    | 8.2 ± 1.7 <sup>5*</sup>                                                                                                | -                                               | -                                                | Yes <sup>20</sup>                       |
| <b>EGCG</b>                                                                                                        | No                         | 14.1 ± 1.4 <sup>2</sup><br>7.8 ± 0.9 <sup>25</sup>                                                                                                    | Elevation<br>(EC <sub>50</sub> =10.5 ± 1.6) <sup>25</sup><br>8.4 ± 0.6 <sup>25</sup> | 101 ± 9 <sup>25</sup><br>Yes <sup>26</sup>                                                                             | 334 ± 58 <sup>27*</sup>                         | 162 ± 29 <sup>27*</sup>                          | Yes <sup>20</sup>                       |
| <b>Caffeic acid</b>                                                                                                | No                         | -                                                                                                                                                     | -                                                                                    | -                                                                                                                      | 5.22 <sup>28</sup><br>16.6 ± 3.7 <sup>29</sup>  | 30.8 <sup>28</sup><br>5.4 ± 1.3 <sup>29</sup>    | Yes <sup>30</sup>                       |
| <b>Ferulic acid</b>                                                                                                | No                         | -                                                                                                                                                     | -                                                                                    | -                                                                                                                      | 9.01 <sup>28</sup>                              | 7.35 ± 3.73 <sup>31</sup>                        | Yes <sup>32</sup>                       |
| <b>Curcumin</b>                                                                                                    | 23.5 ± 0.5*                | 3.81 <sup>33</sup>                                                                                                                                    | 33.7 <sup>33</sup>                                                                   | Yes <sup>5</sup>                                                                                                       | -                                               | -                                                | Yes <sup>34</sup>                       |
| <b>Gallic acid</b>                                                                                                 | No                         | -                                                                                                                                                     | 1.60 ± 0.60 <sup>35</sup>                                                            | -                                                                                                                      | 1.24 ± 0.36 <sup>31</sup><br>3.73 <sup>36</sup> | 9.02 ± 3.24 <sup>31</sup><br>29.41 <sup>36</sup> | Yes <sup>37</sup>                       |
| <b>Resveratrol</b>                                                                                                 | Yes (46%, 100 μM)          | 9.1 <sup>38</sup>                                                                                                                                     | 11.6 <sup>38</sup>                                                                   | 8.3 <sup>38</sup>                                                                                                      | Yes <sup>39</sup>                               | Yes <sup>39</sup>                                | 6.64 <sup>40</sup><br>Yes <sup>39</sup> |
| <b>Ellagic acid</b>                                                                                                | Elevation<br>(13%, 100 μM) | -                                                                                                                                                     | -                                                                                    | -                                                                                                                      | 0.207 <sup>41</sup>                             | -                                                | Yes <sup>37</sup>                       |

K<sub>i</sub> values of OATP4C1 are expressed as mean ± S.E. Data for IC<sub>50</sub>, K<sub>i</sub>, or EC<sub>50</sub> values of the food ingredients are obtained from previous reports. Asterisk (\*) indicates a K<sub>i</sub> value instead of an IC<sub>50</sub>

value. EC<sub>50</sub> value is expressed as mean  $\pm$  S.E. if the compound elevates the transporter mediated uptake. Yes, the food ingredients inhibited the transporter-mediated substrate uptake (inhibition degree, concentration of the flavonoid (if available)); No, no inhibition or elevation was observed; -, no data available; Elevation, elevation was observed.
